# Supplementary material for: Time Gating of Chloroplast Autofluorescence Allows Clearer Fluorescence Imaging In Planta
Source: PubMed Central journal article supplement (PMC4814121; doi:10.1371/journal.pone.0152484), 2016-03-30
Supplement: pone.0152484.s003.pdf [file pone.0152484.s003.pdf]

a

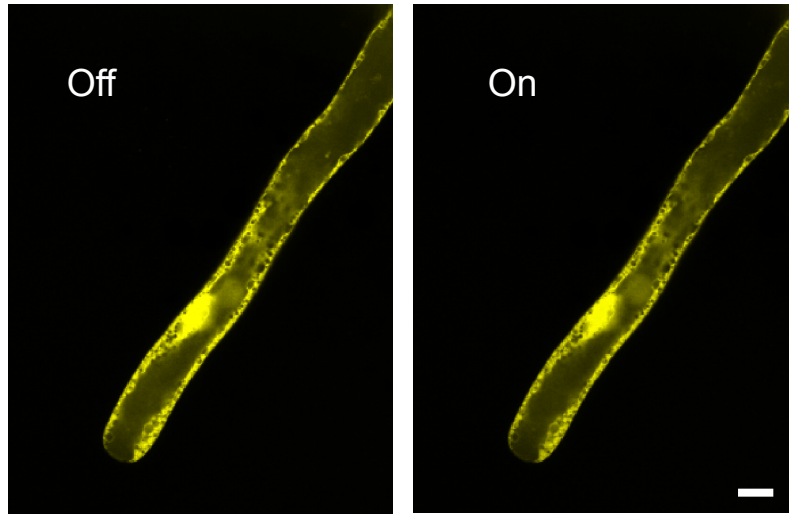

b

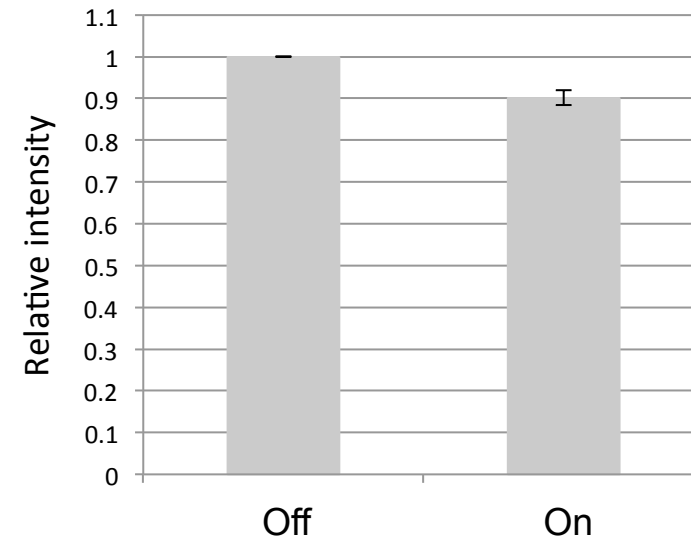

**S3 Fig. Observation of time-gated reduction of Citrine fluorescence intensity using rhizoid cells of *Marchantia polymorpha*.**

(a) Representative images of time-gated reduction of Citrine fluorescence intensity at the yellow wavelength region (520–561 nm) using a 514-nm laser. Time gating was performed at 0.3–12.0 ns as gate-on time. To clearly determine Citrine fluorescence, rhizoid cells were used, in which any mature chloroplast is not developed. Scale bar, 10  $\mu\text{m}$ . (b) Light intensities are shown as relative intensity that was calculated by dividing the mean intensities of gate-off experiments. All experiments were performed thrice (with three different samples).
